# Supplementary material for: Enhanced piezoelectricity and spectral absorption in Nd-doped bismuth titanate hierarchical microspheres for efficient piezo-photocatalytic H2 production and pollutant degradation
Source: Royal Society of Chemistry journal article supplement (doi:10.1039/d3ta06341k), 2023-12-20
Supplement: d3ta06341k1.pdf [file d3ta06341k1.pdf]

## Supplemental information

Enhanced Piezoelectricity and Spectral Absorption in Nd-doped Bismuth  
Titanate Hierarchical Microspheres for Efficient Piezo-photocatalytic H<sub>2</sub>  
Production and Pollutant Degradation

Yan Zhao, Yan Zhang\*, Qianqian Xu, Hanyu Gong, Mingyang Yan, Kaiyu Feng, Xiang  
Zhou, Xuefan Zhou\*, Dou Zhang

*State Key Laboratory of Powder Metallurgy, Central South University, Changsha, Hunan 410000, China*

\* Corresponding authors

E-mail: [zhouxuefan@csu.edu.cn](mailto:zhouxuefan@csu.edu.cn); [yanzhangcsu@csu.edu.cn](mailto:yanzhangcsu@csu.edu.cn)

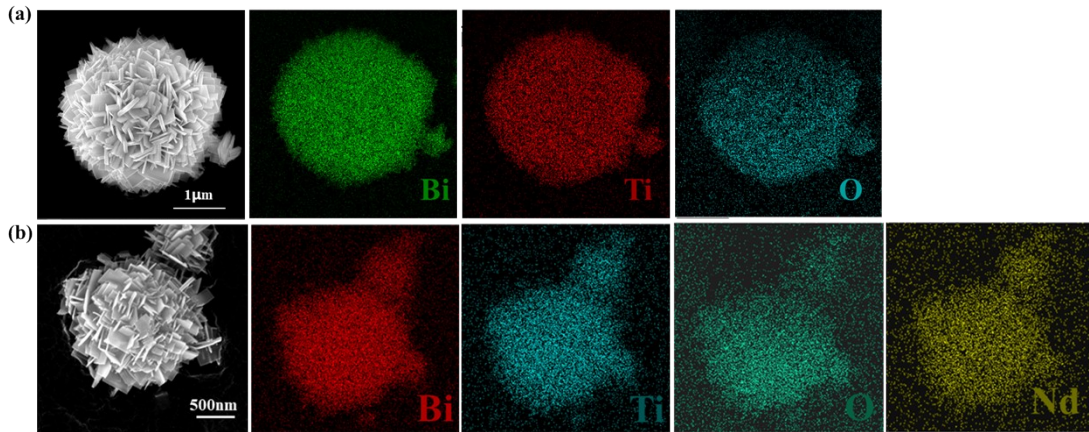

Fig. S1. EDS mapping images of (a) BIT (b)BIT-Nd powders.

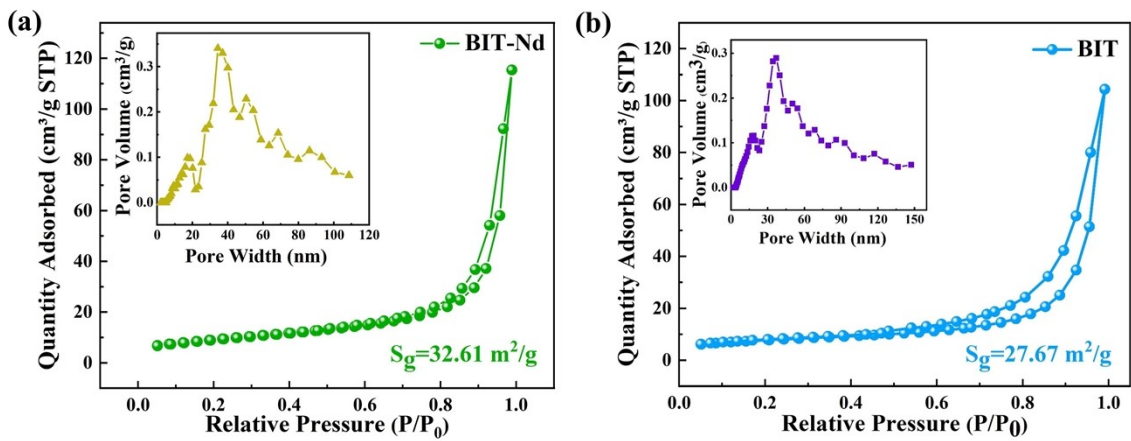

Fig. S2. N<sub>2</sub> sorption isotherm and pore size distribution curve of BIT-Nd and BIT powders.

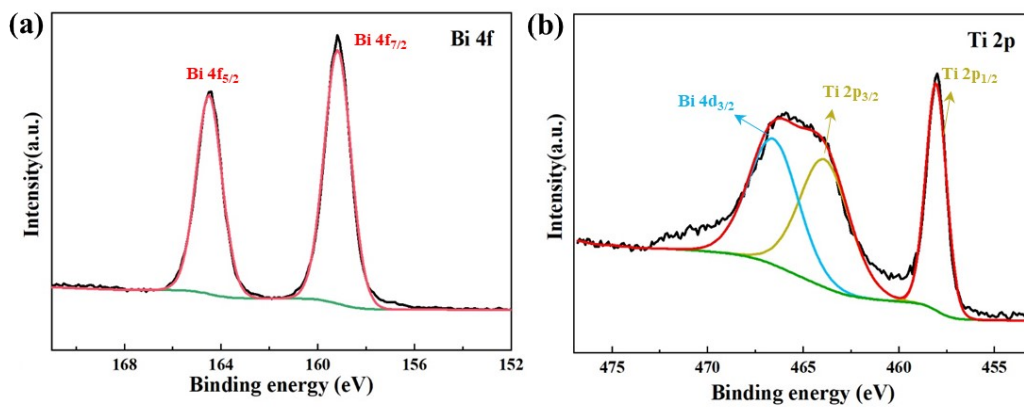

Fig. S3. The high-resolution XPS spectra of (a) Bi 4f and (b) Ti 2p of the BIT-Nd powders.

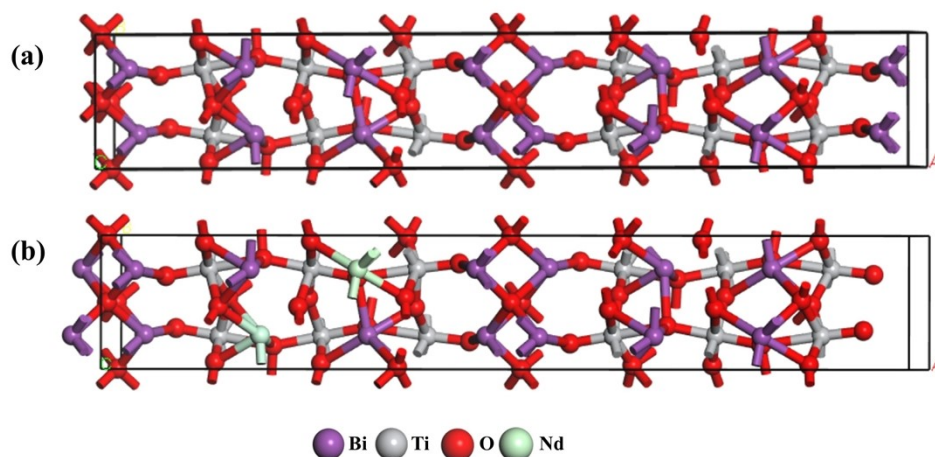

Fig. S4 Optimized structures of (a) BIT and (b) BIT-Nd.

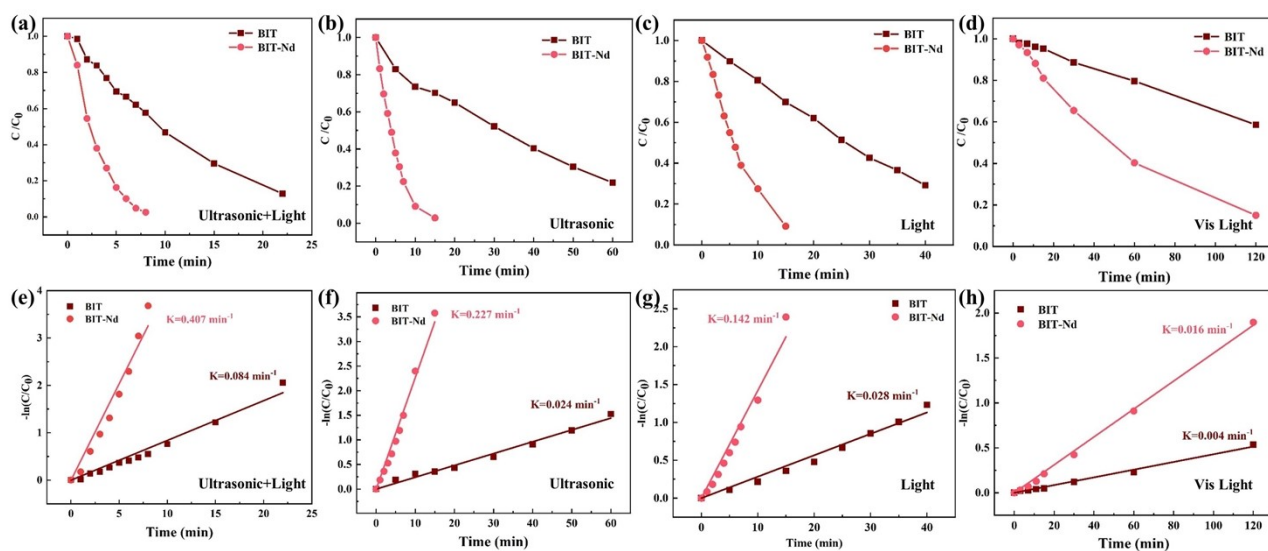

Fig. S5  $C/C_0$  and  $\ln(C_0/C) - t$  curve of BIT and BIT-Nd for degradation of 10 mg/L RhB under Vis Light (420-1100 nm), Light (190-1100 nm), Ultrasonic and combined Ultrasonic and Light excitation.

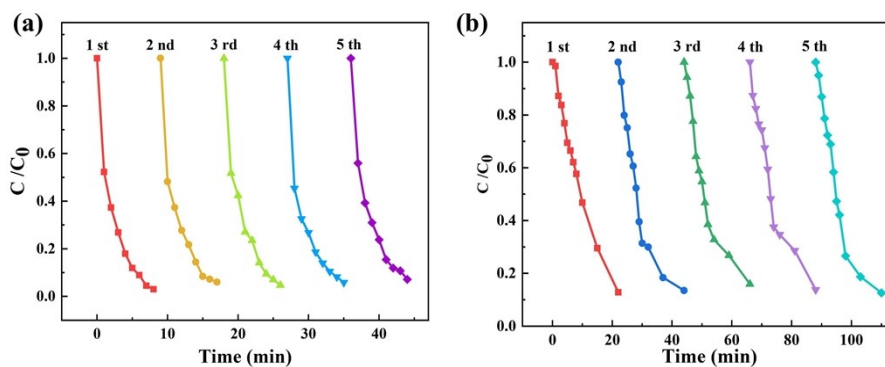

Fig. S6 Recycling of BIT-Nd and BIT powders during 5 piezo-photocatalytic cycles.

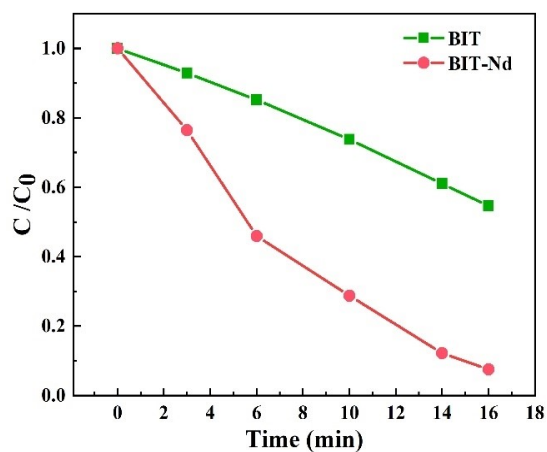

Fig. S7 Piezo-photocatalytic performance of BIT and BIT-Nd under ultrasonic and light for the degradation of 40 mg/L RhB

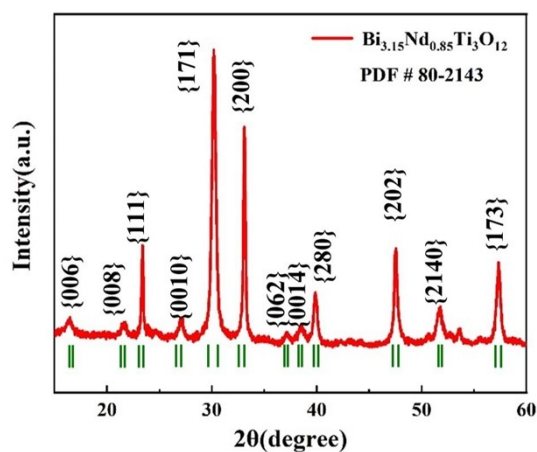

Fig. S8 XRD pattern of BIT-Nd powders after six cycles of H<sub>2</sub> production

Table S1 Comprehensive comparison of previously reported piezo-photocatalysts and this work for degradation of RhB.

|   | Catalyst                                                                  | C<br>(Catalyst) | Dye | C <sub>0</sub><br>(Dye) | Condition                                                  | k×10 <sup>-3</sup><br>(min <sup>-1</sup> ) | Ref. |
|---|---------------------------------------------------------------------------|-----------------|-----|-------------------------|------------------------------------------------------------|--------------------------------------------|------|
| 1 | Bi <sub>0.5</sub> Na <sub>0.5</sub> TiO <sub>3</sub><br>nanospheres       | 0.5 g/L         | RhB | 10 mg/L                 | Ultrasonic:40 kHz,110 W;<br>Light: 200 mW cm <sup>-2</sup> | ~61                                        | 1    |
| 2 | Bi <sub>0.5</sub> Na <sub>0.5</sub> TiO <sub>3</sub><br>@TiO <sub>2</sub> | 0.5 g/L         | RhB | 10 mg/L                 | Ultrasonic:40 kHz,100 W;<br>Light: visible light 300 W     | 27.9                                       | 2    |

|    |                                                                          |         |     |         |                                                        |       |              |
|----|--------------------------------------------------------------------------|---------|-----|---------|--------------------------------------------------------|-------|--------------|
| 3  | $\text{Na}_{0.5}\text{K}_{0.5}\text{NbO}_3\text{-}$<br>$6\text{LiNbO}_3$ | 4 g/L   | RhB | 5 mg/L  | Ultrasonic                                             | 25.16 | 3            |
| 4  | $\text{BaTiO}_3@\text{TiO}_2$<br>microflowers                            | 0.5 g/L | RhB | 10 mg/L | Ultrasonic:45 kHz,200 W;<br>Light: visible light 300 W | 274   | 4            |
| 5  | CBN particles                                                            | 0.5 g/L | RhB | 10 mg/L | Ultrasonic:45 kHz,200 W;<br>Light: visible light 300 W | 131   | 5            |
| 6  | $\text{Bi}_{0.5}\text{Na}_{0.5}\text{TiO}_3@$<br>$\text{BiVO}_4$         | 1.0 g/L | RhB | 5 mg/L  | Ultrasonic:45 kHz,200W;<br>Light: 300 W                | 110   | 6            |
| 7  | BTCNO/5%-CN                                                              | 0.6g/L  | RhB | 10 mg/L | Ultrasonic:45 kHz;<br>Light: 300 W                     | 48.9  | 7            |
| 8  | BNT rods                                                                 | 1g/L    | RhB | 5 mg/ L | Ultrasonic:28 kHz,200w<br>Light: 300w                  | ~94   | 8            |
| 9  | hexagonal ZnO<br>crystals                                                | 1g/L    | RhB | 10 mg/L | Ultrasonic:40 kHz,300w<br>Light: 300w                  | 23.75 | 9            |
| 10 | $\text{BaTiO}_3@\text{ReS}_2$                                            | 0.4g/L  | RhB | 10 mg/L | Ultrasonic:40 kHz,100w<br>Light: UV-vis                | 133   | 10           |
| 11 | 0.02La-BaTiO <sub>3</sub>                                                | 1g/L    | RhB | 5 mg/L  | Ultrasonic:40 kHz,100w<br>Light: 300 W                 | 274   | 11           |
| 12 | $\text{Bi}_4\text{Ti}_3\text{O}_{12}$<br>nanoplates                      | 1g/L    | RhB | 5 mg/L  | Ultrasonic:300 W, 40 kHz<br>Light: 300W                | 141.4 | 12           |
| 13 | $\text{BaTiO}_3\text{-OV}$                                               | 1.0g/L  | RhB | 10 mg/L | Ultrasonic:50 kHz,100 W                                | 25.3  | 13           |
| 14 | 5%-Cl-ZnO NRs                                                            | 0.2g/L  | RhB | 10 mg/L | Ultrasonic:40 kHz,100 W<br>Light: 300w                 | 23.2  | 14           |
| 15 | BIT-Nd                                                                   | 1g/L    | RhB | 10mg/L  | Ultrasonic:45 kHz,200 W;<br>Light: 300 W               | 407   | This<br>Work |

## References

1. Z. Zhao, L. Wei, S. Li, L. Zhu, Y. Su, Y. Liu, Y. Bu, Y. Lin, W. Liu and Z. Zhang, *J. Mater. Chem. A*, 2020, **8**, 16238-16245.
2. X. Xu, X. Lin, F. Yang, S. Huang and X. Cheng, *J. Phys. Chem. C*, 2020, **124**, 24126-24134.
3. A. Zhang, Z. Liu, B. Xie, J. Lu, K. Guo, S. Ke, L. Shu and H. Fan, *Appl. Catal. B-Environ.*, 2020, **279**, 119353-119365.
4. Q. Liu, F. Zhan, H. Luo, D. Zhai, Z. Xiao, Q. Sun, Q. Yi, Y. Yang and D. Zhang, *Appl. Catal. B-Environ.*, 2022, **318**, 121817-121831.
5. Q. Liu, F. Zhan, X. Luo, Q. Yi, Z. Xiao, D. Zhai, J. Huang, Y. Zhang, H. Luo, D. Zhang and C. R. Bowen, *Nano Energy*, 2023, **108**, 108252-108266.
6. Q. Liu, Q. Hu, D. Zhai, Q. Sun, H. Luo and D. Zhang, *J. Mater. Chem. A*, 2021, **9**, 17841-17854.
7. J. Bai, J. Xiang, C. Chen and C. Guo, *Chem. Eng. J.*, 2023, **456**, 141095-141102.
8. X. Zhou, Q. Sun, D. Zhai, G. Xue, H. Luo and D. Zhang, *Nano Energy*, 2021, **84**, 1-12.
9. F. Peng, H. Li, W. Xu, H. Min, Z. Li, F. Li, X. Huang, W. Wang and C. Lu, *Appl. Surf. Sci.*, 2021, **545**, 149032-149044.
10. W. Liu, P. Wang, Y. Ao, J. Chen, X. Gao, B. Jia and T. Ma, *Adv. Mater.*, 2022, **34**, 2202508-2202516.
11. C. Yu, J. He, M. Tan, Y. Hou, H. Zeng, C. Liu, H. Meng, Y. Su, L. Qiao, T. Lookman and Y. Bai, *Adv. Funct. Mater.*, 2022, **32**, 2209365-2209377.
12. Z. Xie, X. Tang, J. Shi, Y. Wang, G. Yuan and J.-M. Liu, *Nano Energy*, 2022, **98**, 107247-107258.
13. P. Wang, X. Li, S. Fan, X. Chen, M. Qin, D. Long, M. O. Tadé and S. Liu, *Appl. Catal. B-Environ.*, 2020, **279**, 119340-119349.
14. J. Yuan, X. Huang, L. Zhang, F. Gao, R. Lei, C. Jiang, W. Feng and P. Liu, *Appl. Catal. B-Environ.*, 2020, **278**, 119291-119299.
